# Supplementary material
Source: publisher figshare collection journal article supplement (https://geolsoc.figshare.com/ndownloader/files/28250012)
Supplement: Supplementary file 1 [file 28250012]

Table 3. TIMA heavy mineral analysis
Sample		At	Ap	Cr	Ru	To	Zr	Br	count	ATi	count	RuZi	count	CZi	count	ZTR
Tullig Cyclothem	304	13.0	13.3	1.4	40.3	19.2	7.5	5.2	624	40.9	203	84.3	298	16.1	56	67.0
	219	15.8	12.2	2.4	30.3	14.9	22.3	2.1	1714	45.0	464	57.7	902	9.7	423	67.5
	212	9.6	16.6	0.8	35.1	22.6	10.0	5.3	1316	42.4	516	77.9	593	7.7	142	67.7
Bridges of Ross	414B	21.7	9.0	0.3	38.7	17.3	9.2	3.8	1608	34.1	422	80.8	771	3.3	153	65.2
	414A	19.4	9.2	0.1	40.5	17.9	10.7	2.2	703	34	191	79.1	360	1.3	76	69.1
	413A	15.4	5.6	0.2	37.7	17.0	23.6	0.4	1222	24.6	276	61.5	750	1	292	78.3
	412	20.7	7.8	0.1	41.7	17.0	8.7	4.1	1413	31.4	350	82.7	711	1.6	125	67.4
	411A	13.3	6.9	0.2	34.9	12.8	31.0	1.0	1105	35.0	217	52.9	729	0.6	345	78.7
	409A	18.6	8.8	0.0	47.1	15.9	6.9	2.7	434	35.5	107	87.2	235	0	30	69.9
	406	12.3	7.2	1.0	41.5	14.1	20.7	3.2	1024	33.9	218	66.7	637	4.5	222	76.3
	403	22.2	8.8	0.2	37.0	17.3	10.5	3.9	421	33.6	110	78.0	200	2.2	45	64.8
At: Anatase; Ap: Apatite; Cr: Chrome spinel; Ru: Rutile; To: Tourmaline; Zr: Zircon; Br: Brookite
ATi: Apatite-tourmaline index; RuZi: Rutile-zircon index; CZi: Chrome spinel-zircon index; ZTR: Zircon-tourmaline-rutile index
Heavy mineral data given as percentages
